# Supplementary material
Source: publisher figshare collection journal article supplement (https://rs.figshare.com/ndownloader/files/35142800)
Supplement: Supplementary file 1 [file 35142800]

**Tab. S5**: *Elongase* (*ELO*) and *fatty acyl-CoA reductase* (*FAR*) genes in the *Nasonia* reference genome homologous to *D. melanogaster ELOs* and *FARs* with a demonstrated impact on CHC profiles (*ELO*s: *CG18609*, *CG30008*, *CG9458*, *eloF*; *FAR*s: *CG10097*, *CG13091;* see Tab. S2). Indicated are the gene annotations, gene and respective protein IDs obtained from RefSeq, linkage map positions and recombination rates (Kb/cM).

| Gene annotation | RefSeq Gene ID | RefSeq Protein IDs | Linkage map position | Recombination rate (Kb/cM) |
| --- | --- | --- | --- | --- |
| *elo1* | 100114999 | XP_016845887.1 XP_008214189.1 XP_008214188.1 XP_001599838.1 | c1: 46.7 cM | 3.6211 |
| *elo2* | 100115035 | XP_001599867.1 | c1: 46.7 cM | 3.6211 |
| *elo3* | 100115068 | XP_003428006.1 | c1: 46.7 cM | 3.6211 |
| *elo4* | 100115103 | XP_008214193.1 XP_001599914.2 XP_016845633.1 | c1: 46.7 cM | 3.6211 |
| *elo5* | 100115131 | XP_001599942.1 | c1: 46.7 cM | 3.6211 |
| *elo6* | 100115199 | XP_001599996.2 XP_016838633.1 | c1: 46.7 cM | 3.6211 |
| *elo7* | 100115239 | XP_016838697.1 XP_001600017.1 | c1: 46.7 cM | 3.6211 |
| *elo8* | 100115278 | XP_001600048.1 | c1: 46.7 cM | 3.6211 |
| *elo9* | 100116202 | XP_008205141.1 | c3: 42.3 cM | 0.3664 |
| *elo10* | 100118619 | XP_008205429.1 | c4: 47.5 cM | 0.8598 |
| *elo11* | 100120094 | XP_001603768.2 | c3: 38 cM | 11.8001 |
| *elo12* | 100123468 | XP_001607111.2 | c5: 16.1 cM | 1.8931 |
| *far1* | 100115559 | XP_008213286.1 | c1: 48.9 cM | 22.4845 |
| *far2* | 100115595 | XP_008213287.2 | c1: 48.9 cM | 22.4845 |
| *far3* | 100115642 | XP_001600309.1 | c1: 48.9 cM | 22.4845 |
| *far4* | 100115711 | XP_001601168.1 | c1: 49.6 cM | 20.7846 |
| *far5* | 100117683 | XP_016845554.1 XP_016845553.1 XP_016845552.1 XP_016845551.1 XP_008205703.1 | c1: 49.6 cM | 20.7846 |
| *far6* | 100117801 | XP_008205709.1 XP_001601942.1 | c1: 49.6 cM | 20.7846 |
| *far7* | 100117837 | XP_001601970.1 | c1: 49.6 cM | 20.7846 |
| *far8* | 100118857 | XP_008212002.1  XP_008212003.1 | c1: 51.8 cM | 2.0759 |
| *far9* | 100118893 | XP_001602762.2 | c1: 51.8 cM | 2.0759 |
| *far10* | 100119003 | XP_001602857.1 | c1: 51.8 cM | 2.0759 |
| *far11* | 100121470 | XP_016841641.1 XP_016841638.1 XP_016841633.1 | c1: 48.2 cM | 20.6198 |
| *far12* | 100121766 | XP_008217013.1 | c5: 19 cM | 0.2367 |
| *far13* | 100123790 | XP_001607507.3 | c1: 83.2 cM | 0.5953 |
| *far14* | 103317077 | XP_016836513.1 | c1: 51.8 cM | 2.0759 |
| *far15* | 100117218 | XP_001601521.2 | c2: 85.4 cM | 0.1672 |
| *far16* | 100117254 | XP_001601550.4 | c2: 85.4 cM | 0.1672 |
| *far17* | 100117104 | XP_001601438.1 | c2: 85.4 cM | 0.1672 |
| *far18* | 100117143 | XP_001601466.1 | c2: 85.4 cM | 0.1672 |
| *far19* | 100117180 | XP_001601494.1 | c2: 85.4 cM | 0.1672 |
| *far20* | 100117760 | XP_016836801.1 XP_016836800.1 | c1: 49.6 cM | 20.7846 |
| *far21* | 100679544 | XP_003426741.2 | c2: 86.9 cM | NA |
| *far22* | 100117878 | XP_016843183.1 | c3: 38 cM | 0.1544 |
